# Supplementary material
Source: PubMed Central journal article supplement (PMC11249350)
Supplement: NIHPP2024.03.29.586899v2-supplement-1.pdf [file NIHPP2024.03.29.586899v2-supplement-1.pdf]

551 SUPPLEMENTARY FIGURES

552

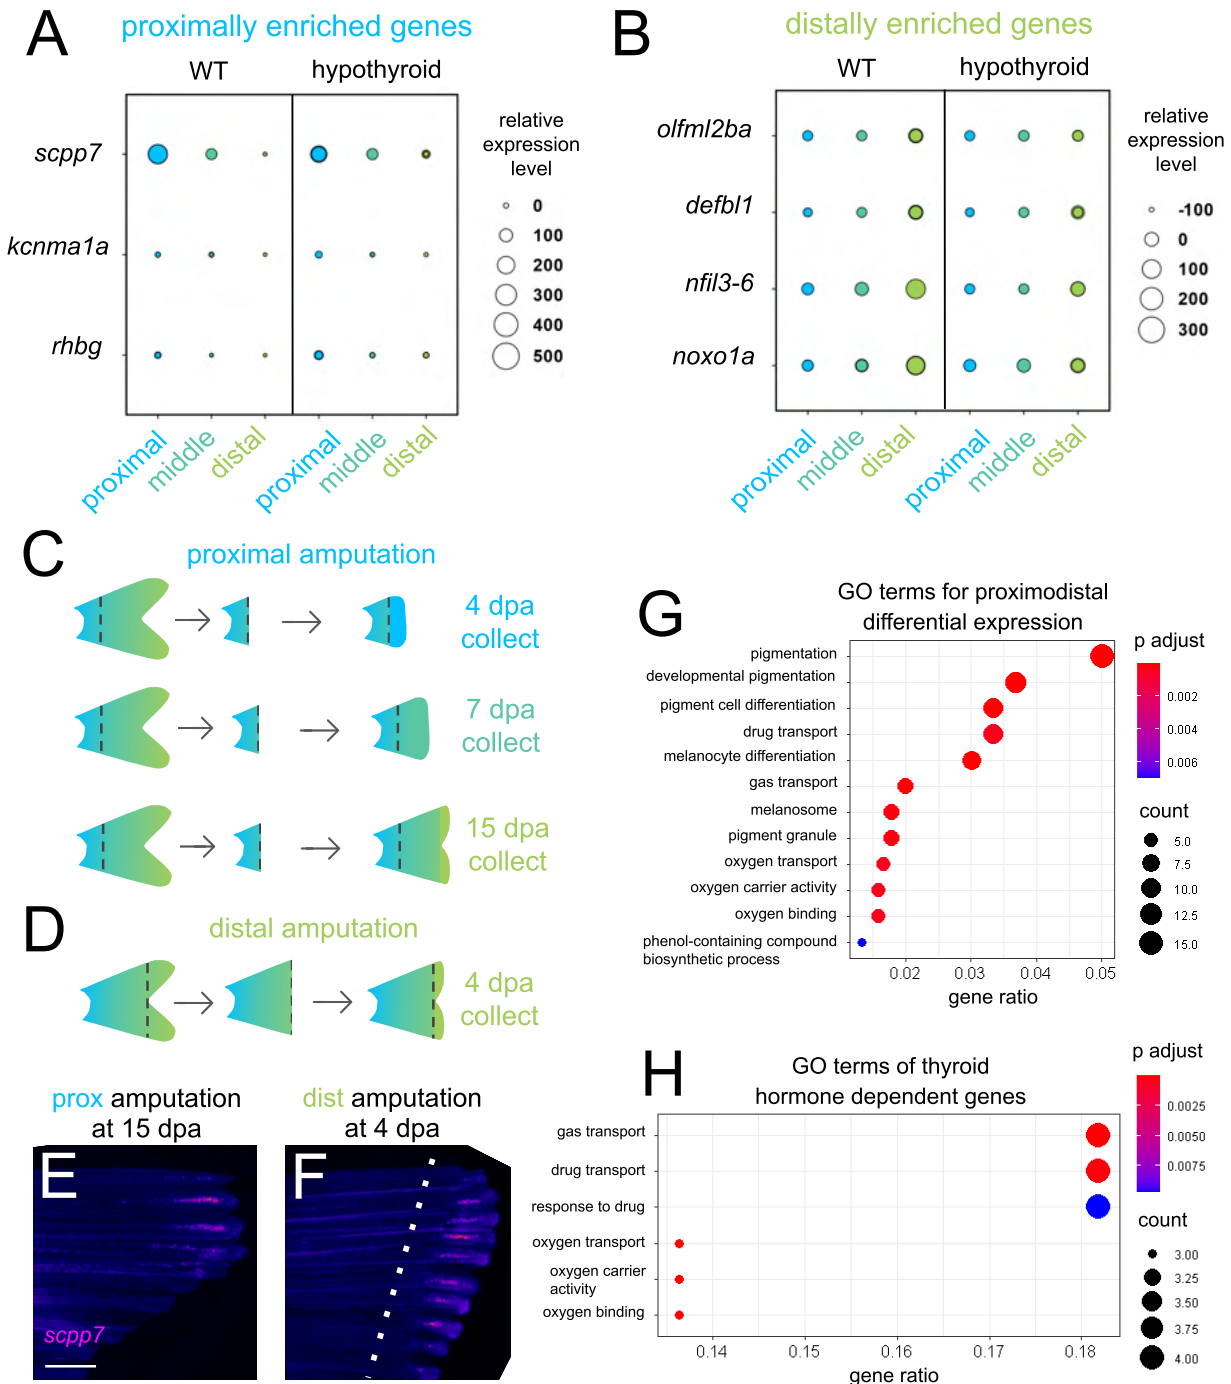

553

554 **Supplementary Figure 1. Differentially expressed gene candidates for fluorescent *in situ***  
 555 **hybridization.** Thyroid hormone-dependent gene candidates that are either (A) proximally  
 556 enriched or (B) distally enriched in WT tissues. Custom RNAscope probes were made and  
 557 tested for all genes, but only the *scpp7* probe showed specific staining. (C-D) Schematic

558 showing sample collection with (C) proximal or (D) distal amputation. (E) Proximally amputated  
559 at 15dpa or (F) distally amputated 4dpa tissue stained for *scpp7*. Amputation plane, dashed line.  
560 Warm colors indicate highest regions of expression. (G) GO enrichment of the 489 genes  
561 proximodistal differentially expressed in WT. (H) GO enrichment of the 45 genes that were  
562 thyroid hormone dependent and proximodistal differentially expressed in WT. Scale bar, 400  $\mu$ m.

563

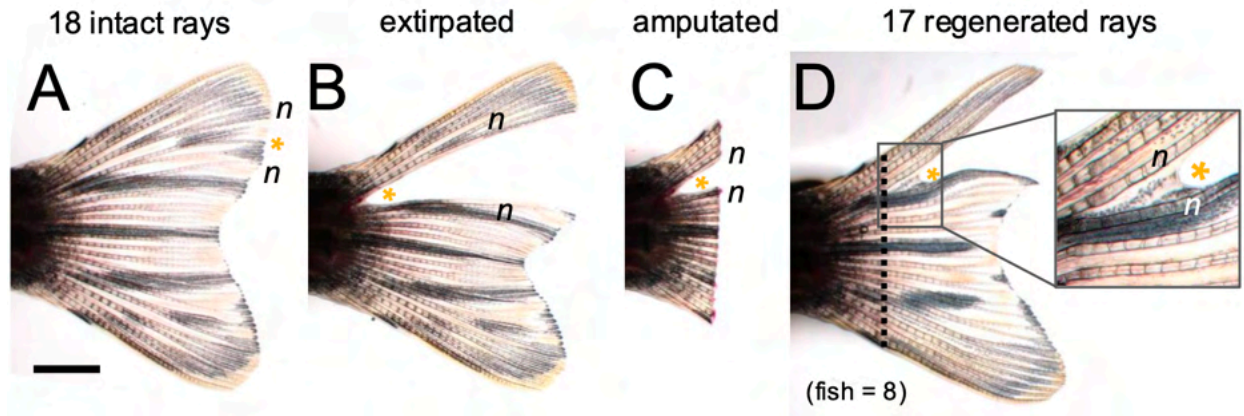

564

565 **Supplementary Figure 2. Regeneration does not originate from an extirpated ray.** (A)  
566 Intact fin with 18 rays, dorsal ray 4 (D4) marked with yellow asterisk. (B) Fin one day post D4  
567 extirpation. (C) Freshly amputated fin, one day post D4 extirpation. (D) Fin regenerates with 17  
568 rays (one-less ray than original, intact fin). n indicates neighboring dorsal rays 3 and 5.  
569 Amputation plane, dashed line. Scale bar, 2 mm.

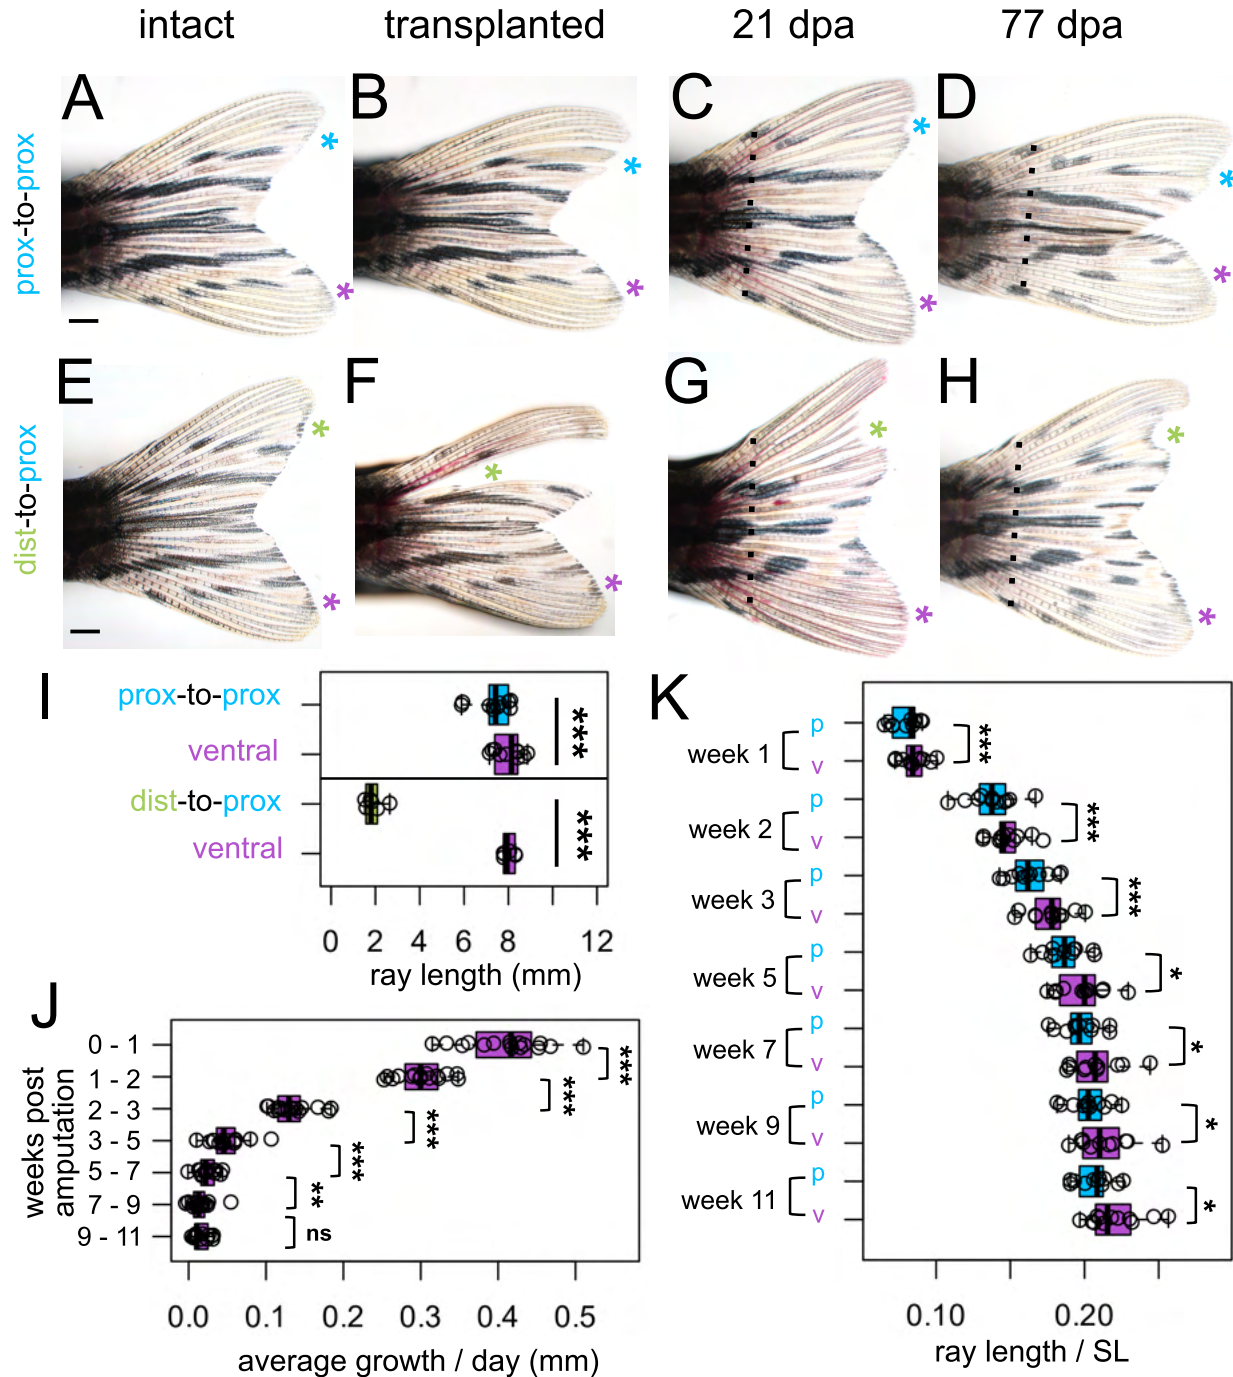

570

571 **Supplementary Figure 3. Non-transplanted rays regenerated faster than transplanted**  
 572 **rays.** Fins of (A-D) proximal-to-proximal (blue asterisk) or (E-H) distal-to-proximal (green  
 573 asterisk) transplantation: (A, E) intact pre-transplantation, (B-F) one day post-transplantation,  
 574 (C-G) regenerating at 21 dpa, (D, H) regenerating at 77 dpa. Ventral rays indicated with purple  
 575 asterisks. Amputation plane, dashed line. (I) Length of the rays after transplantation, as  
 576 measured from the peduncle. (J) Average amount of growth per day during a one/two week  
 577 periods for all the ventral ray comparisons. (K) Prox-to-prox rays versus ventral ray

578 comparisons, ray length (measured from amputation plane) divided by SL at each week.  
579 Significance determined by paired Welch two-sample t tests. Scale bar, 1 mm.

580

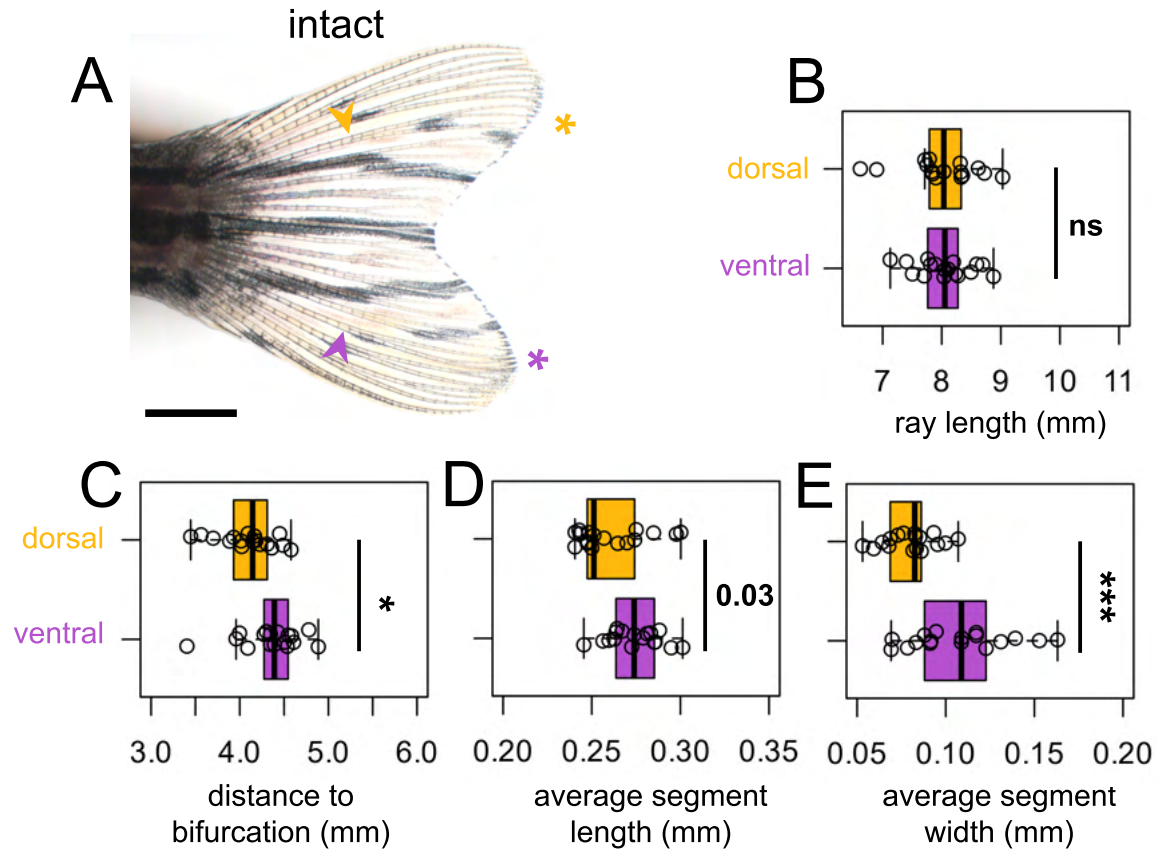

581

582 **Supplementary Figure 4. Dorsal ray patterning is unique from ventral ray patterning.** (A)  
583 Intact fin. A yellow or purple asterisk indicates dorsal ray 4 or ventral ray 4, respectively.  
584 Arrowheads, primary bifurcations. Boxplots showing the (B) total length of the ray, (C)  
585 proximodistal position of the bifurcation, (D) average segment length, and (E) average segment  
586 width measured from a set distance from the peduncle. Significance determined by a paired  
587 Welch two-sample t test. Scale bar, 2 mm.

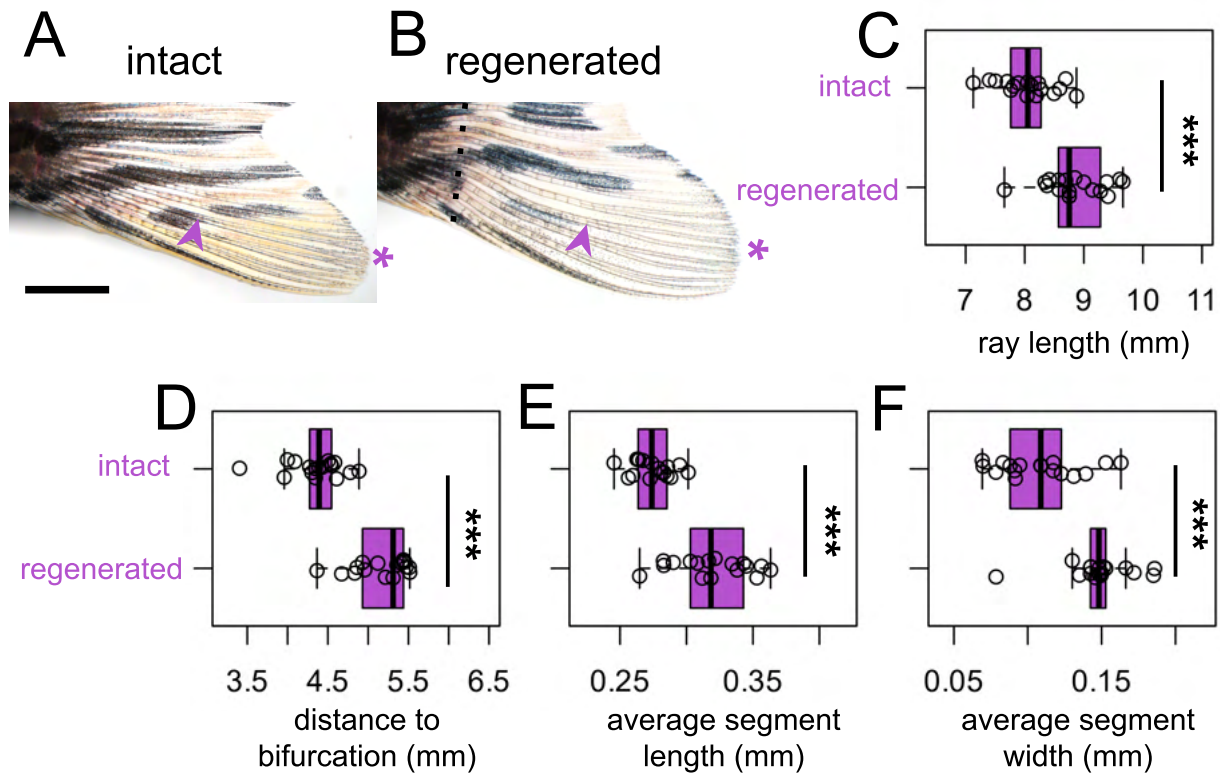

588

589 **Supplementary Figure 5. Intact and regenerated ray patterning are different.** (A-B) Ventral  
590 lobe of (A) intact or (B) regenerating fin at 35dpa. Purple asterisks indicate ventral ray 4.  
591 Arrowheads, primary bifurcations. Amputation plane, dashed line. Boxplots showing the (C) total  
592 length of the ray, (D) proximodistal position of the bifurcation, (E) average segment length, and  
593 (F) average segment width measured from a set distance from the peduncle. Significance  
594 determined by a paired Welch two-sample t test. Scale bar, 2 mm.

595

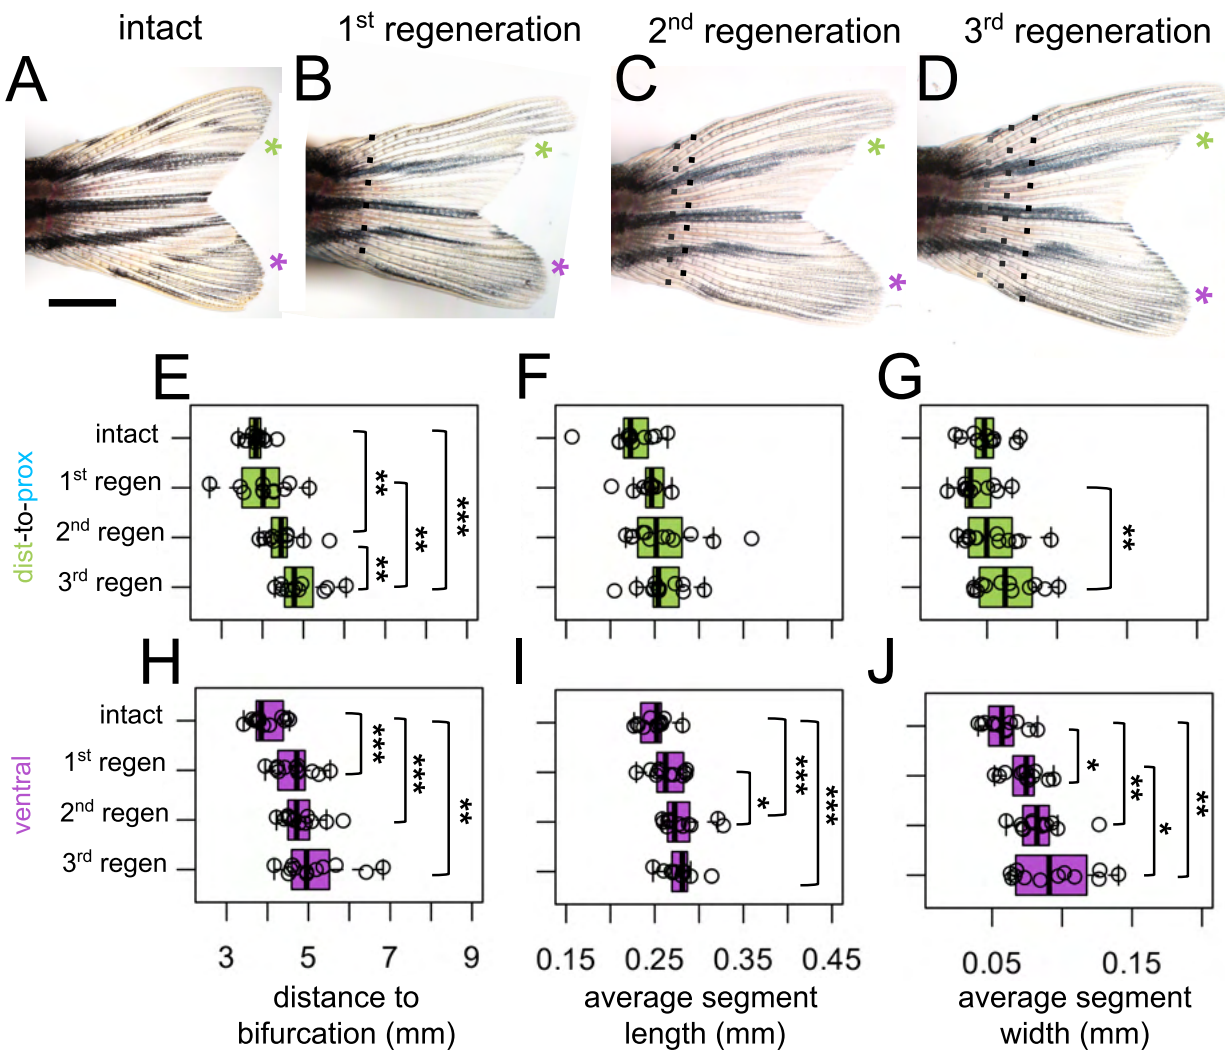

596

597 **Supplementary Figure 6. Regenerative ray patterning differs from previous regenerated**  
 598 **morphology.** (A) Intact fin. (B-D) Regenerating fin after distal-to-proximal transplantation: (B)  
 599 28 days post first amputation, (C) 28 days post second amputation, (C) 28 days post third  
 600 amputation. Green or purple asterisks indicate dist-to-prox or ventral ray, respectively. Black  
 601 dashed line, most recent amputation. Grey dashed lines, previous amputation planes. (E, H)  
 602 Boxplots showing the proximodistal position of the bifurcation. Note that bifurcations form at  
 603 increasingly distal location after each amputation, as previously described. Boxplots showing  
 604 (F, I) average segment length, and (G, J) average segment width. All measurements were taken  
 605 from a set distance from the peduncle. Significance determined by paired repeated samples  
 606 ANOVA followed by pairwise t tests. Scale bar, 2 mm.





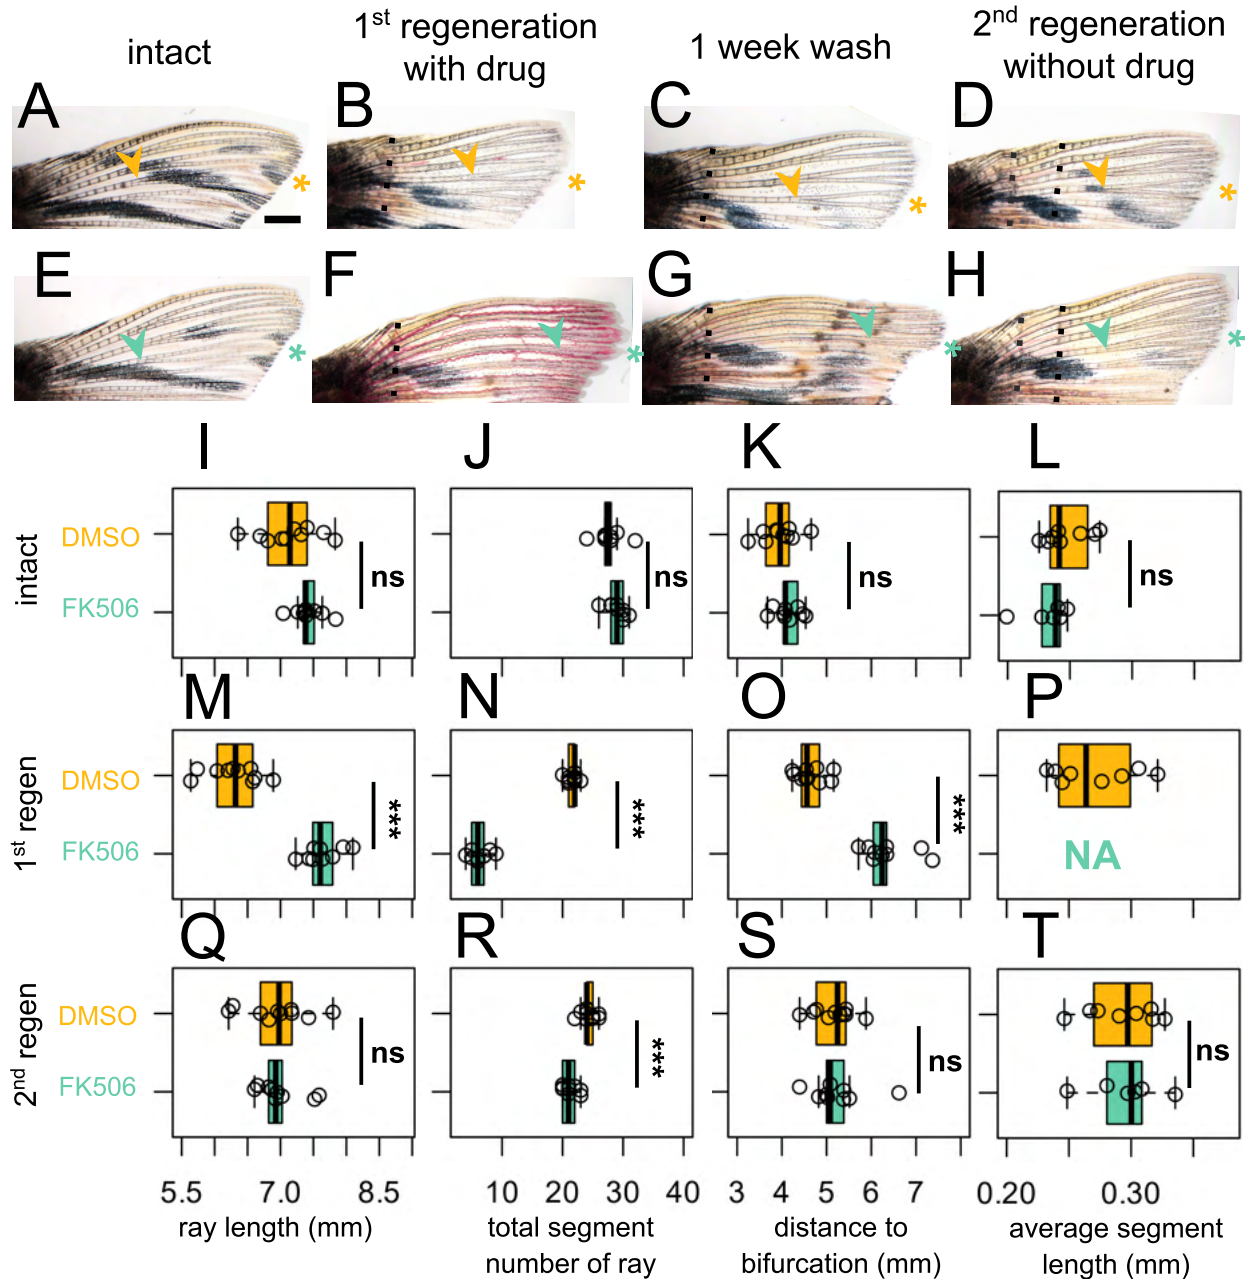

617

618 **Supplementary Figure 8. Calcineurin inhibition-induced morphologies are not**  
 619 **remembered in subsequent regeneration cycles.** (A, E) Intact dorsal lobe before treatment.  
 620 (B, F) Regenerated fin after (B) DMSO (yellow asterisk) or (F) 200 nM FK506 (turquoise  
 621 asterisk) treatment, 21 days post amputation. (C, G) Fins after one week wash to clear  
 622 remaining drug from water. (D, H) Regenerated fin 21 days post second amputation with no  
 623 treatment. Black dashed line, most recent amputation. Grey dashed lines, previous amputation  
 624 plane. Boxplots showing (I, M, Q) total ray length, (J, N, R) total number of segments of the ray,  
 625 (K, O, S) bifurcation position, and (L, P, T) average segment length for (I-L) intact, (M-P) first  
 626 regeneration with respective drug treatment, and (Q-T) second regeneration with no drug  
 627 treatment. All measurements were taken from a set distance from the peduncle. Note in (P),

628 rays were built from only ~5 segments, making segments lengths so long that none were  
629 contained by the standard region of interest measured. Significance determined by unpaired  
630 Welch two-sample t test. Scale bar, 1 mm.

**A** DR3 - to - DR7's position & DR7 - to - DR3's position  
(Shibata et al., 2018)

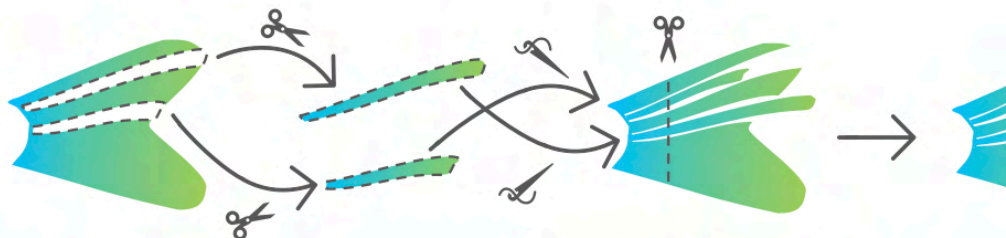

**B** proximal blastema - to - proximal blastema & distal blastema - to - proximal blastema  
(Shibata et al., 2018)

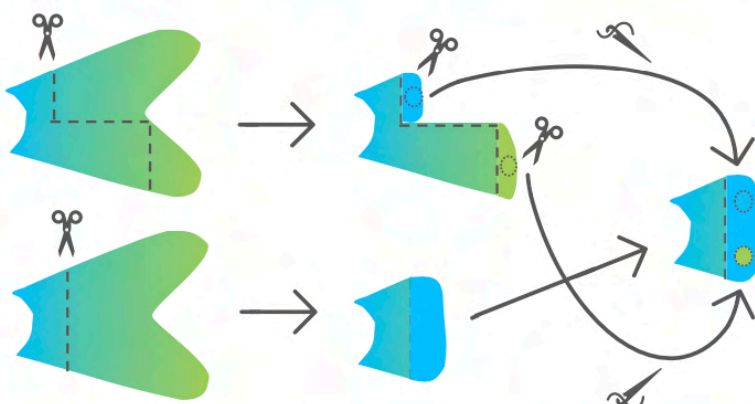

**C** distal hemiray segments - to - proximal opposing hemiray  
(Murciano et al., 2007)

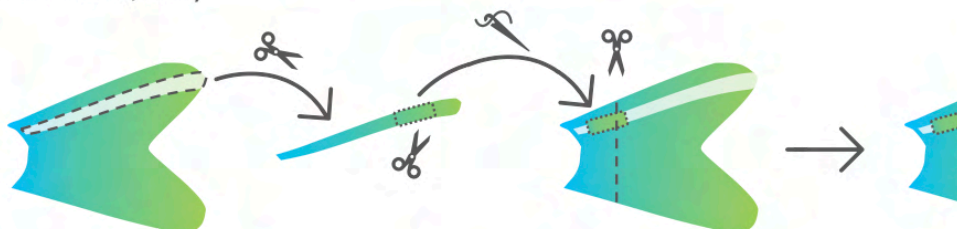

**D** proximal hemiray segments - to - distal opposing hemiray  
(Murciano et al., 2007)

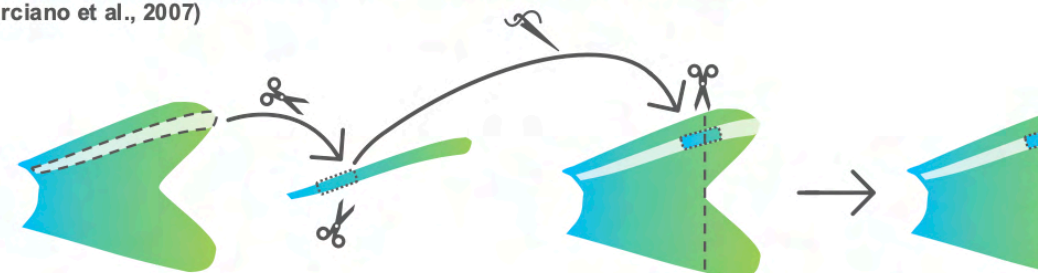

proximal  distal

632 **Supplementary Figure 9. Historical transplantation experiments.** (A) Shibata et al., 2018  
633 performed full ray transplantations, moving dorsal ray 3 into dorsal ray 7 position and vice versa.  
634 After successful grafting, they amputated the entire. (B) Shibata et al., 2018 also made a  
635 proximal and distal amputation in a fin, collected blastema tissue from each region, and then  
636 transplanted these tissues into a proximally regenerating fin. (C) Murciano et al., 2007  
637 extirpated an entire distal hemiray from the fin. A distal hemiray segment was grafted onto a  
638 proximal region to appose a proximal hemiray segment, then the entire fin was amputated  
639 through the graft. (D) Murciano et al., 2007 further extirpated a single hemiray, then grafted a  
640 proximal hemiray segment onto a distal region to appose a distal hemiray, then the entire fin  
641 was amputated through the graft.

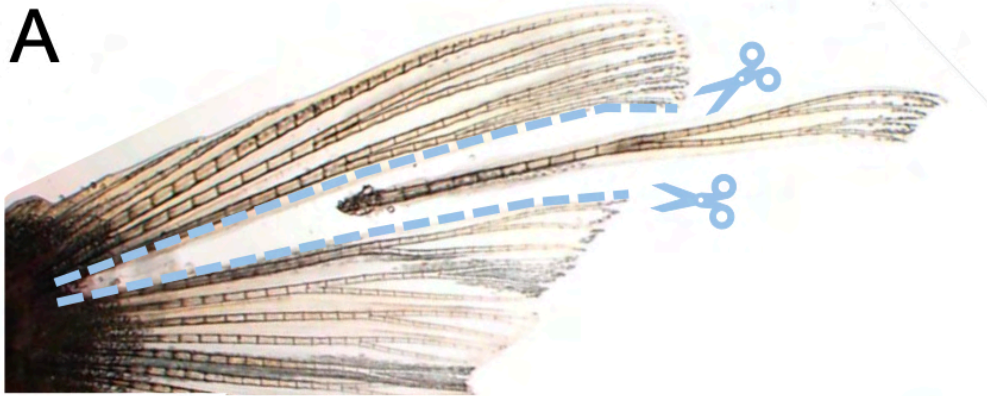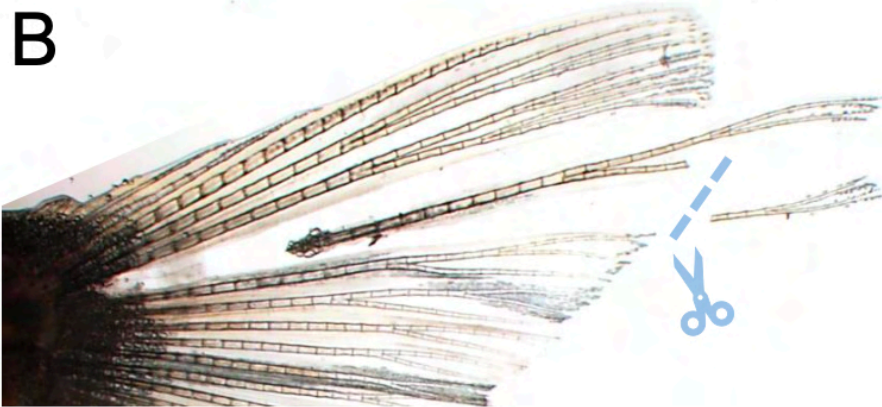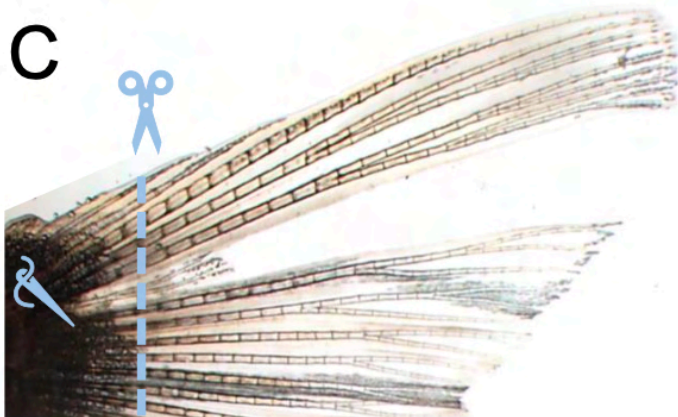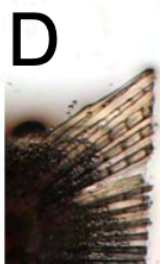

643 **Supplementary Figure 10. Distal-to-proximal transplantation.** (A) Interray tissue is cut  
644 sliced on either side of dorsal ray 4, permitting the ray to be cleanly plucked out of the peduncle.  
645 (B) Distal ray tissue is removed from the rest of the ray. (C-D) After allowing 24hrs for the  
646 transplanted tissue to graft, the entire fin is amputated.
